# Supplementary material
Source: MDPI journal article supplement (https://www.mdpi.com/2073-4352/12/3/338)
Supplement: s1 [file s1]

# Anharmonic Motion in the Crystal Structure of 2-Mercaptopyridone

Martin Lutz\*, Tom J. Smak, and Arnaud T. Sanderse

## Supplementary Materials

**Table S1.** Temperature-dependent unit cell determinations. At each temperature, a 360°  $\phi$ -scan was performed with a rotation increment of 0.3°. The detector distance was kept fixed at 40 mm during the complete experiment. The unit cells were obtained from full intensity integrations with Eval15 [1] resulting in 3250–3512 reflections per temperature ( $\theta_{\max} = 30.43$ – $30.78^\circ$ ). The cell parameters correspond to the  $P2_1/c$  space group setting which is consistent with the literature [2].<sup>1</sup> Literature data are provided for comparison.

| T [K] | a [Å]     | b [Å]     | c [Å]       | $\beta$ [°] | V [Å <sup>3</sup> ] |
|-------|-----------|-----------|-------------|-------------|---------------------|
| 100   | 6.0245(3) | 6.2566(2) | 14.1095(7)  | 101.803(3)  | 520.58(4)           |
| 120   | 6.0311(3) | 6.2626(2) | 14.1307(6)  | 101.911(2)  | 522.23(4)           |
| 140   | 6.0379(3) | 6.2688(3) | 14.1515(5)  | 102.030(2)  | 523.88(4)           |
| 160   | 6.0450(2) | 6.2754(2) | 14.1743(7)  | 102.145(3)  | 525.67(4)           |
| 180   | 6.0523(3) | 6.2815(3) | 14.1990(10) | 102.254(3)  | 527.51(5)           |
| 200   | 6.0595(6) | 6.2862(5) | 14.223(2)   | 102.360(5)  | 529.21(10)          |
| 220   | 6.0678(5) | 6.2926(4) | 14.254(2)   | 102.503(5)  | 531.32(10)          |
| 240   | 6.0768(5) | 6.2991(4) | 14.282(2)   | 102.644(4)  | 533.45(9)           |
| 260   | 6.0847(5) | 6.3038(7) | 14.3128(16) | 102.797(6)  | 535.36(9)           |

**Literature data:**

|                   |                      |                      |                       |                       |        |
|-------------------|----------------------|----------------------|-----------------------|-----------------------|--------|
| 298 (PYRIDS[3])   | 6.10 ( $\pm 0.3\%$ ) | 6.31 ( $\pm 0.3\%$ ) | 14.35 ( $\pm 0.3\%$ ) | 103° 01' ( $\pm 5'$ ) |        |
| 298 (PYRIDS02[2]) | 6.113(5)             | 6.325(5)             | 14.400(9)             | 103.1(1)              |        |
| 116 (PYRIDS03[4]) | 6.044(1)             | 6.273(1)             | 14.146(2)             | 101.93                | 524.77 |
| 298 (PYRIDS11[2]) | 6.107(2)             | 6.325(2)             | 14.382(4)             | 103.0(5)              |        |

<sup>1</sup> At 200, 220, 240 and 260 K the  $P2_1/n$  setting would give a  $\beta$  angle closer to 90°.

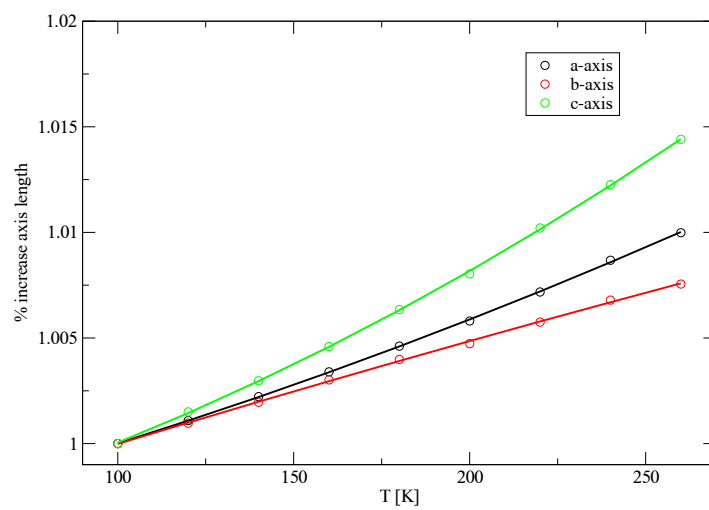

**Figure S1.** Temperature dependent development of unit cell parameters. The drawn lines were obtained from quadratic fits.

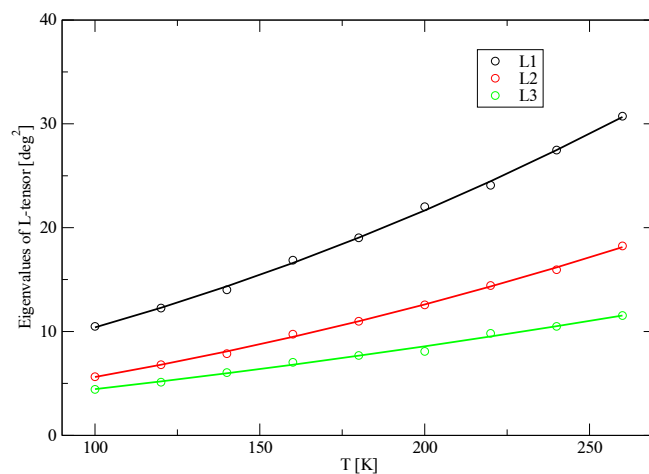

**Figure S2.** Temperature dependence of the L-tensor from a rigid-body TLS analysis. The analysis was performed with the routine CALC TMA in the PLATON software [5]. Drawn are the eigenvalues L1, L2 and L3 of the L-tensor. The lines were obtained from quadratic fits.

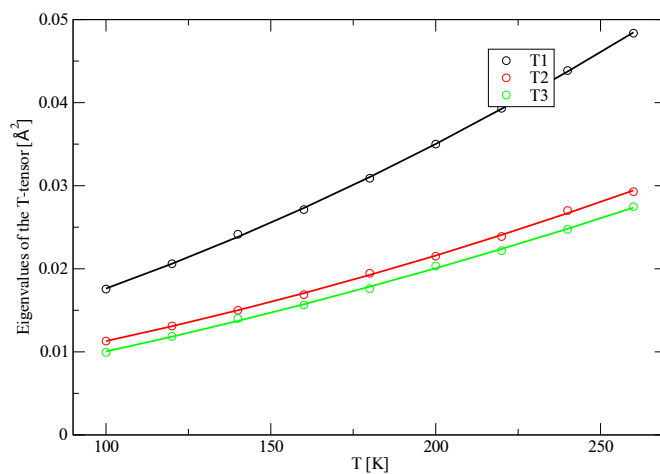

**Figure S3.** Temperature dependence of the T-tensor from a rigid-body TLS analysis. The analysis was performed with the routine CALC TMA in the PLATON software [5]. Drawn are the eigenvalues T1, T2 and T3 of the T-tensor. The lines were obtained from quadratic fits.

**Table S2.** Temperature dependence of the N–H $\cdots$ S hydrogen bond. Symmetry code *i*: –x, 1–y, –z.

| T [K] | N1–H1 [Å] | H1 $\cdots$ S1 <sup><i>i</i></sup> [Å] | N1 $\cdots$ S1 <sup><i>i</i></sup> [Å] | N1–H1 $\cdots$ S1 <sup><i>i</i></sup> [°] |
|-------|-----------|----------------------------------------|----------------------------------------|-------------------------------------------|
| 100   | 0.865(17) | 2.425(17)                              | 3.2728(9)                              | 166.6(14)                                 |
| 120   | 0.864(17) | 2.427(16)                              | 3.2742(9)                              | 166.8(14)                                 |
| 140   | 0.879(16) | 2.414(16)                              | 3.2743(9)                              | 166.2(13)                                 |
| 160   | 0.873(16) | 2.420(16)                              | 3.2755(9)                              | 166.5(13)                                 |
| 180   | 0.877(16) | 2.419(16)                              | 3.2761(9)                              | 165.5(14)                                 |
| 200   | 0.862(16) | 2.438(16)                              | 3.2778(10)                             | 164.8(13)                                 |
| 220   | 0.873(16) | 2.426(16)                              | 3.2787(10)                             | 165.5(13)                                 |
| 240   | 0.868(16) | 2.436(16)                              | 3.2800(11)                             | 164.4(13)                                 |
| 260   | 0.854(16) | 2.454(15)                              | 3.2818(11)                             | 163.4(13)                                 |

**Table S3.** Temperature dependence of the intermolecular  $\pi\cdots\pi$  stacking interaction. Cg: center of gravity of six-membered ring. Symmetry code *i*: –x, –y, –z. Cg\_perp: perpendicular distance of Cg to the ring.

| T [K] | Cg $\cdots$ Cg <sup><i>i</i></sup> [Å] | Cg_perp [Å] | Slippage [Å] |
|-------|----------------------------------------|-------------|--------------|
| 100   | 3.6708(6)                              | 3.3927(4)   | 1.402        |
| 120   | 3.6770(6)                              | 3.4005(4)   | 1.399        |
| 140   | 3.6827(6)                              | 3.4078(4)   | 1.396        |
| 160   | 3.6886(6)                              | 3.4142(4)   | 1.396        |
| 180   | 3.6953(7)                              | 3.4222(4)   | 1.394        |
| 200   | 3.7014(8)                              | 3.4285(5)   | 1.395        |
| 220   | 3.7103(9)                              | 3.4384(5)   | 1.394        |
| 240   | 3.7172(9)                              | 3.4469(5)   | 1.391        |
| 260   | 3.7258(9)                              | 3.4562(5)   | 1.392        |

Current level: 0.195

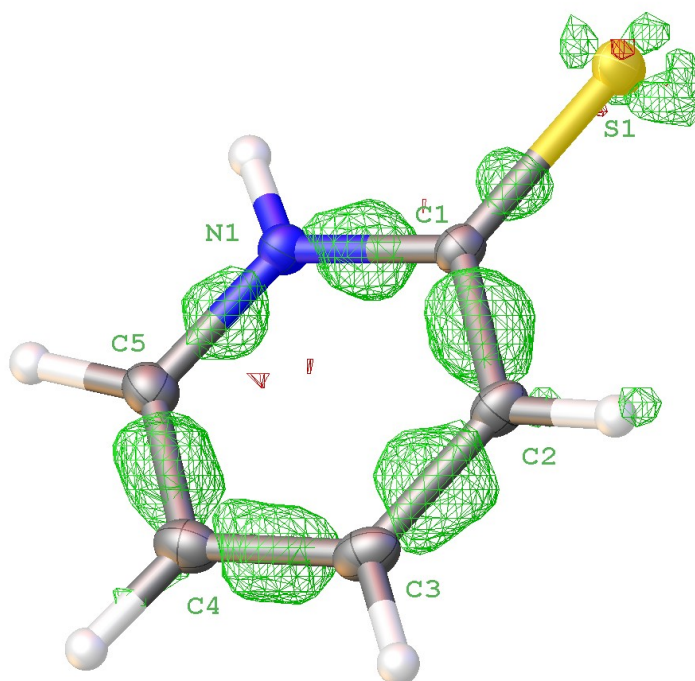

**Figure S4.** Difference electron density in **(I)**. Contour level  $0.195 \text{ e}/\text{\AA}^3$ . Positive contours are drawn in green, negative in red. Calculated structure factors are taken from the spherical atom model refined with SHELXL [6]. Maximum resolution  $\theta = 62^\circ$ . Plot prepared with Olex2 [7].

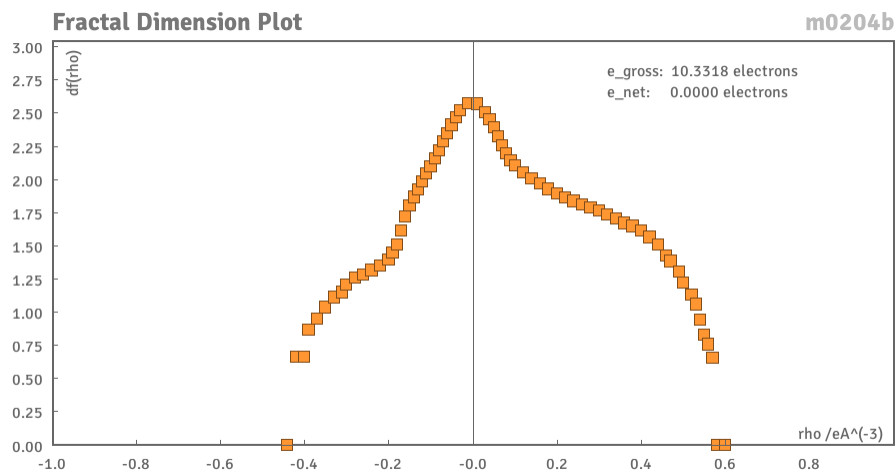

**Figure S5.** Fractal dimension plot [8] of the residual electron density from the spherical atom model. The same data as in Figure S4 were used. Plot prepared with Olex2 [7].

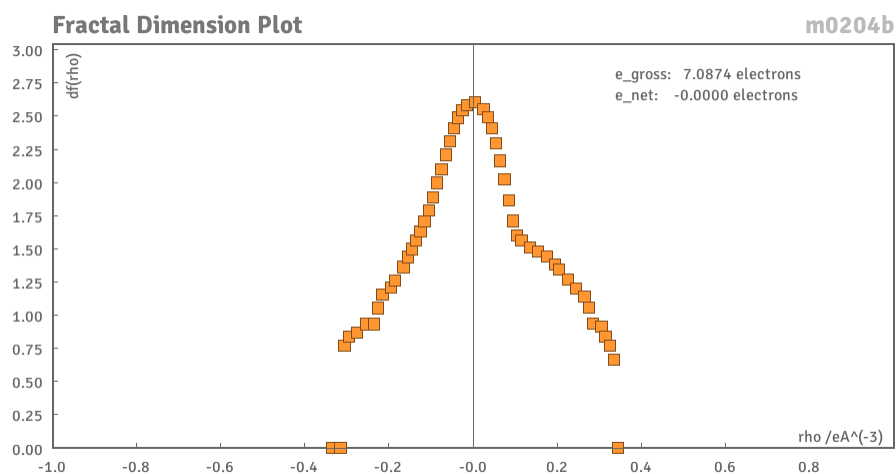

**Figure S6.** Fractal dimension plot [8] of the residual electron density from the non-spherical atom model (NoSpherA2). Plot prepared with Olex2 [7].

**Table S4.** Kitajgorodskij packing index (K.P.I.) [9] calculated with the PLATON software [5]. The analysis is based on the van-der-Waals radii of the atoms.

|                                  | T [K] | C–H [Å]           | K.P.I. |
|----------------------------------|-------|-------------------|--------|
| Present study: <b>I</b> (SHELXL) | 100   | 0.909(9)–1.008(8) | 71.5%  |
| NOLZEV19 [10] (SHELXL)           | 100   | 0.95              | 69.2%  |

**Table S5.** Void calculation with CrystalExplorer (Version 21.5) [11]. Hydrogen atoms are normalized to standardized neutron distances. The calculation is based on the electron density from quantum chemical calculations. An isosurface of 0.002 e/au<sup>3</sup> was used.

|                         | V (unit cell) [Å <sup>3</sup> ] | V (void) [Å <sup>3</sup> ] | Void (percentage) |
|-------------------------|---------------------------------|----------------------------|-------------------|
| Present study: <b>I</b> | 521.243(9)                      | 27.74                      | 5.3%              |
| NOLZEV19 [10]           | 1980.7(7)                       | 227.26                     | 11.5%             |

**Table S6.** Comparison of NoSpherA2 refinements with isotropic and anisotropic displacement parameters for the hydrogen atoms.  $P = (F_o^2 + 2F_c^2)/3$ .

|                                             | NoSpherA2 ( $H_{iso}$ )                           | NoSpherA2 ( $H_{aniso}$ )                         |
|---------------------------------------------|---------------------------------------------------|---------------------------------------------------|
| weighting scheme                            | $w = 1/[\sigma^2(F_o^2) + (0.0157P)^2 + 0.0052P]$ | $w = 1/[\sigma^2(F_o^2) + (0.0130P)^2 + 0.0049P]$ |
| no. of refl.                                | 8374                                              | 8374                                              |
| no. of param.                               | 84                                                | 109                                               |
| R1 [ $I > 2\sigma(I)$ ]                     | 0.0125                                            | 0.0116                                            |
| wR2 [ $I > 2\sigma(I)$ ]                    | 0.0308                                            | 0.0277                                            |
| R1 [all refl.]                              | 0.0155                                            | 0.0146                                            |
| wR2 [all ref.]                              | 0.0325                                            | 0.0292                                            |
| GooF                                        | 1.0085                                            | 1.0097                                            |
| $\Sigma (\Delta^2/\sigma^2)$                | 44037.65                                          | 36141.70                                          |
| $\Delta\rho_{min/max}$ [ $e/\text{\AA}^3$ ] | -0.26/0.28                                        | -0.27/0.28                                        |

**Table S7.** Analysis of variance [12, 13]. The F-values are obtained from the internet [14].  
 $\mathcal{R} = \sqrt{([b/(n-m)] \times F_{b,n-m,\alpha} + 1)}$ .

|                           | No. parameters (b) | deg. of freedom (n-m) | $\Sigma (\Delta^2/\sigma^2)$ |
|---------------------------|--------------------|-----------------------|------------------------------|
| NoSpherA2 ( $H_{iso}$ )   | 84                 | $8374 - 84 = 8290$    | 44037.65                     |
| NoSpherA2 ( $H_{aniso}$ ) | 109                | $8374 - 109 = 8265$   | 36141.70                     |
| Difference                | 25                 | 25                    | 7895.95                      |

R-factor ratio  $\sqrt{(44037.65/36141.70)} = 1.1038$

Significance  $\alpha = 0.001$   $F = 2.1085$ ;  $\mathcal{R} = 1.0032$

Significance  $\alpha = 0.0005$   $F = 2.2021$ ;  $\mathcal{R} = 1.0033$

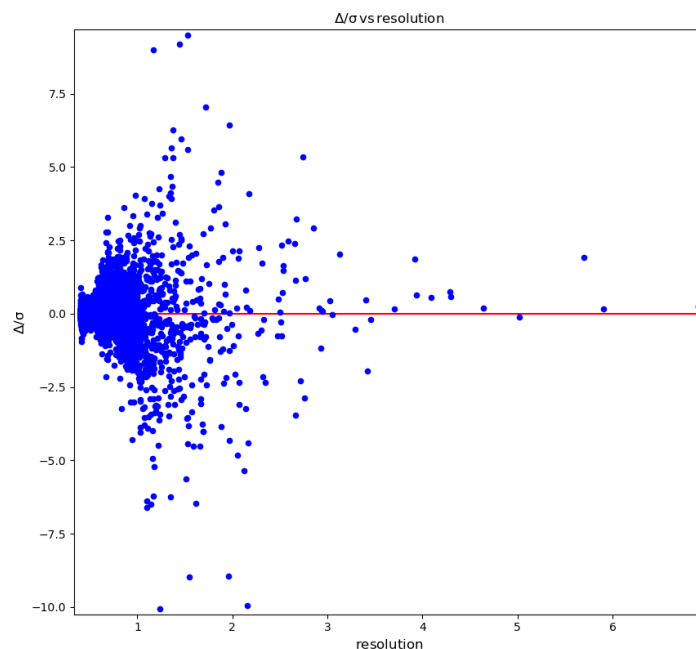

**Figure S7.** Comparison of calculated structure factors from NoSpherA2 refinements with isotropic and with anisotropic hydrogen atoms.  $\Delta = F_{\text{calc}}^2(\text{iso-H}) - F_{\text{calc}}^2(\text{aniso-H})$ .  $\sigma$ -values are taken from the merged reflection files. Resolution =  $\sin \theta / \lambda$ .

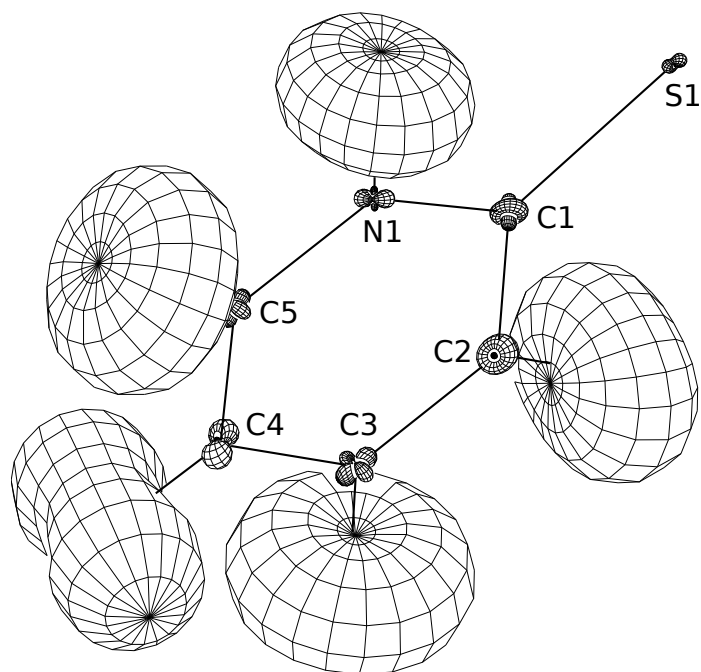

**Figure S8.** Peanut plot [15] of **I** (NoSpherA2 refinement). Shown is the difference between the refined anisotropic displacement parameters and a rigid-body TLS model (THMA11). The scale of the rmsd surfaces is 6.15.



**Table S8.** Analysis of variance [12, 13] for the multipole refinements. The F-values are obtained from the internet [14].  $\mathcal{R} = \sqrt{([b/(n-m)] \times F_{b,n-m,\alpha} + 1)}$ .

Model A. Non-hydrogen atoms with multipoles up to hexadecapole level and anisotropic displacement parameters. Hydrogen atoms fixed on parameters from NoSpherA2.

Model B. Anharmonic motion for sulfur added (up to 3<sup>rd</sup> order).

Model C. Anharmonic motion for all non-hydrogen atoms added (up to 3<sup>rd</sup> order).

Model D. Anisotropic displacement parameters and multipoles up to quadrupole added for hydrogen atoms.

|            | No. parameters (b) | deg. of freedom (n-m) | $\Sigma (\Delta^2/\sigma^2)$ |
|------------|--------------------|-----------------------|------------------------------|
| Model A    | 252                | 8115 – 252 = 7863     | 36621.21                     |
| Model B    | 262                | 8115 – 262 = 7853     | 28652.95                     |
| Difference | 10                 | 10                    | 7968.26                      |

R-factor ratio  $\sqrt{(36621.21/28652.95)} = 1.1305$

Significance  $\alpha = 0.001$   $F = 2.9628$ ;  $\mathcal{R} = 1.0019$

Significance  $\alpha = 0.0005$   $F = 3.1467$ ;  $\mathcal{R} = 1.0020$

|            | No. parameters (b) | deg. of freedom (n-m) | $\Sigma (\Delta^2/\sigma^2)$ |
|------------|--------------------|-----------------------|------------------------------|
| Model B    | 262                | 8115 – 262 = 7853     | 28652.95                     |
| Model C    | 322                | 8115 – 322 = 7793     | 25071.64                     |
| Difference | 60                 | 60                    | 3581.31                      |

R-factor ratio  $\sqrt{(28652.95/25071.64)} = 1.0690$

Significance  $\alpha = 0.001$   $F = 1.6646$ ;  $\mathcal{R} = 1.0064$

Significance  $\alpha = 0.0005$   $F = 1.7165$ ;  $\mathcal{R} = 1.0066$

|            | No. parameters (b) | deg. of freedom (n-m) | $\Sigma (\Delta^2/\sigma^2)$ |
|------------|--------------------|-----------------------|------------------------------|
| Model C    | 322                | 8115 – 322 = 7793     | 25071.64                     |
| Model D    | 377                | 8115 – 377 = 7738     | 20870.48                     |
| Difference | 55                 | 55                    | 4201.16                      |

R-factor ratio  $\sqrt{(25071.64/20870.48)} = 1.0960$

Significance  $\alpha = 0.001$   $F = 1.6984$ ;  $\mathcal{R} = 1.0060$

Significance  $\alpha = 0.0005$   $F = 1.7533$ ;  $\mathcal{R} = 1.0062$

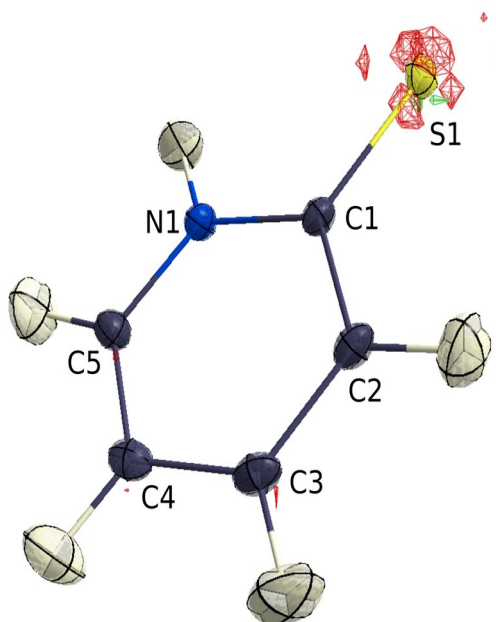

**Figure S9.** Residual density after multipole refinement. Contour level  $0.13 \text{ e}/\text{\AA}^3$ . Positive values in green, negative values in red. Non-hydrogen atoms were refined with anisotropic displacement parameters and their multipoles up to the hexadecapole level. The plot was prepared with the MoleCoolQt software [16].

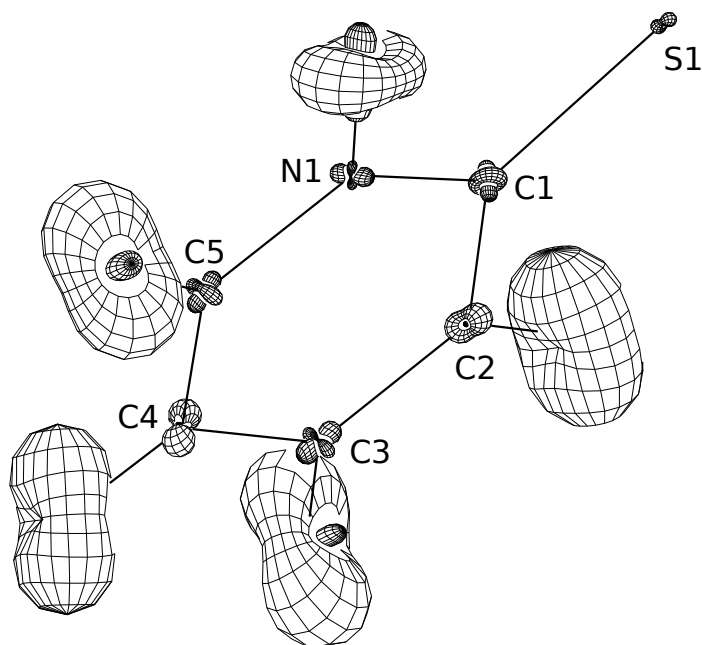

**Figure S10.** Peanut plot [15] of **I** (multipole refinement). Anisotropic hydrogen parameters were refined freely. Shown is the difference between the refined anisotropic displacement parameters and a rigid-body TLS model (THMA11). The scale of the rmsd surfaces is 6.15.

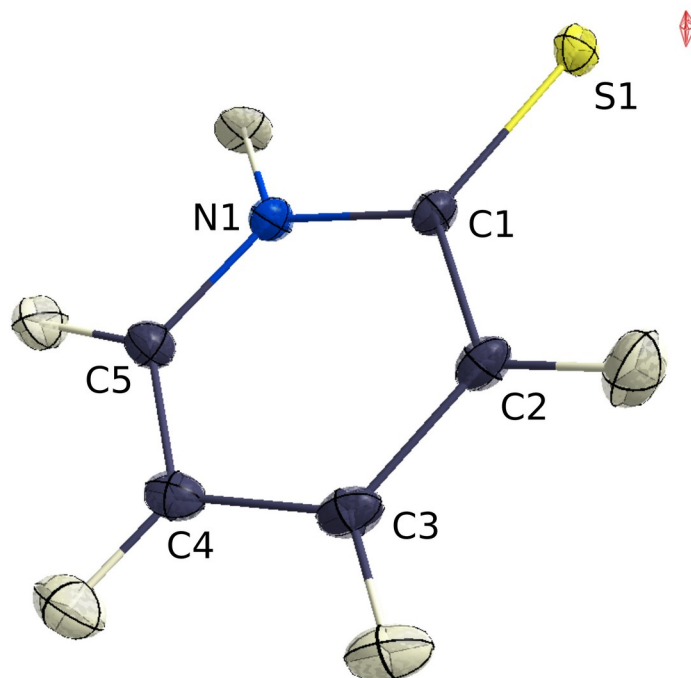

**Figure S11.** Residual density after the final multipole refinement. Contour level  $0.13 \text{ e}/\text{\AA}^3$ . Non-hydrogen atoms were refined with anharmonic displacement parameters (3<sup>rd</sup> level) and their multipoles up to the hexadecapole level. Hydrogen atoms were refined with anisotropic displacement parameters. The plot was prepared with the MoleCoolQt software [16].

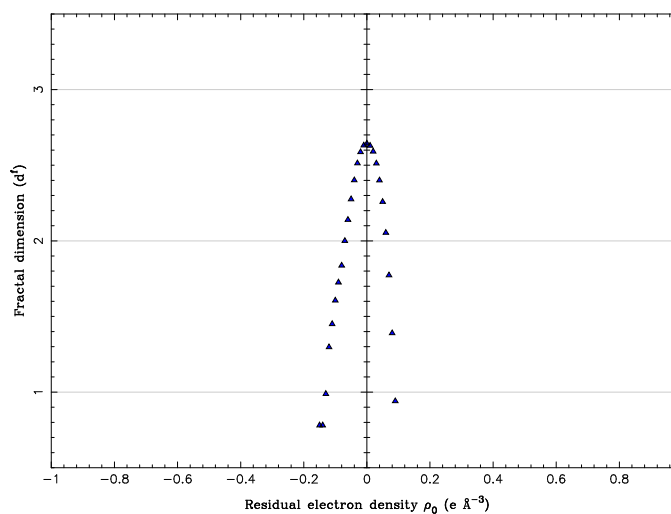

**Figure S12.** Fractal dimension plot [8] after the final multipole refinement,  $e_{\text{gross}} = 5.9750$ . Non-hydrogen atoms were refined with anharmonic displacement parameters (3<sup>rd</sup> level) and their multipoles up to the hexadecapole level. Hydrogen atoms were refined with anisotropic displacement parameters. The plot was prepared with WinXD [17].

**Table S9.** Temperature dependence of the intermolecular C–H $\cdots$ S contact. Symmetry code *i*: x–1, y, z.

| T [K] | C5–H5 [Å] | H5 $\cdots$ S1 <sup>i</sup> [Å] | C5 $\cdots$ S1 <sup>i</sup> [Å] | C5–H5 $\cdots$ S1 <sup>i</sup> [°] |
|-------|-----------|---------------------------------|---------------------------------|------------------------------------|
| 100   | 0.95      | 2.97                            | 3.5704(12)                      | 122                                |
| 120   | 0.95      | 2.98                            | 3.5752(12)                      | 122                                |
| 140   | 0.95      | 2.98                            | 3.5815(12)                      | 122                                |
| 160   | 0.95      | 2.99                            | 3.5877(12)                      | 122                                |
| 180   | 0.95      | 3.00                            | 3.5931(12)                      | 122                                |
| 200   | 0.95      | 3.00                            | 3.5992(13)                      | 122                                |
| 220   | 0.94      | 3.01                            | 3.6057(14)                      | 122                                |
| 240   | 0.94      | 3.02                            | 3.6150(14)                      | 122                                |
| 260   | 0.93      | 3.03                            | 3.6211(14)                      | 123                                |

## References

- [1] Schreurs, A.M.M.; Xian, X.; Kroon-Batenburg, L.M.J. *EVAL15: A diffraction data integration method based on ab initio predicted profiles. J. Appl. Crystallogr.* **2010**, *43*, 70–82.
- [2] Ohms, U.; Guth, H.; Kutoglu, A.; Scherlinger, C. 2-Thiopyridone: X-ray and neutron diffraction study. *Acta Crystallogr. Sect. B* **1982**, *38*, 831–834.
- [3] Penfold, B.R. The crystal structure of  $\alpha$ -thiopyridone. *Acta Crystallogr.* **1953**, *6*, 707–713.
- [4] Reynolds, J.G.; Sendlinger, S.C.; Murray, A.M.; Huffman, J.C.; Christou, G. Synthesis and Characterization of Vanadium(II,III,IV) Complexes of Pyridine-2-thiolate. *Inorg. Chem.* **1995**, *34*, 5745–5752.
- [5] Spek, A.L. Structure validation in chemical crystallography. *Acta Crystallogr. Sect. D* **2009**, *65*, 148–155.
- [6] Sheldrick, G.M. Crystal structure refinement with *SHELXL*. *Acta Crystallogr. Sect. C* **2015**, *71*, 3–8.
- [7] Dolomanov, O.V.; Bourhis, L.J.; Gildea, R.J.; Howard, J.A.K.; Puschmann, H. *OLEX2: A complete structure solution, refinement and analysis program. J. Appl. Crystallogr.* **2009**, *42*, 339–341.
- [8] Meindl, K.; Henn, J. Foundations of residual-density analysis. *Acta Crystallogr. Sect. A* **2008**, *64*, 404–418.
- [9] Kitajgorodskij, A.I. *Molecular Crystals and Molecules*. Academic Press, New-York, 1973.
- [10] Schillmöller, T.; Ruth, P.N.; Herbst-Irmer, R. and Stalke, D. Analysis of Solid-State Luminescence Emission Amplification at Substituted Anthracenes by Host–Guest Complex Formation. *Chemistry – A European Journal* **2020**, *26*, 17390–17398.

- [11] Spackman, P.R.; Turner, M.J.; McKinnon, J.J.; Wolff, S.K.; Grimwood, D.J.; Jayatilaka, D.; Spackman, M.A. *CrystalExplorer*: A program for Hirshfeld surface analysis, visualization and quantitative analysis of molecular crystals. *J. Appl. Crystallogr.* **2021**, *54*, 1006–1011.
- [12] Hamilton, W.C. Significance tests on the crystallographic *R* Factor. *Acta Crystallogr.* **1965**, *18*, 502–510.
- [13] Destro, R.; Roversi, P.; Barzaghi, M.; Lo Presti, L. Anharmonic Thermal Motion Modelling in the Experimental XRD Charge Density Determination of 1-Methyluracil at *T* = 23 K. *Molecules* **2021**, *26*, 3075.
- [14] Soper, D. S. *Critical F-Value Calculator*, <https://www.danielsoper.com/statcalc> (accessed on 26/02/2022), 2022.
- [15] Hummel, W.; Hauser, J. and Bürgi, H.-B. *PEANUT*: Computer graphics program to represent atomic displacement parameters. *Journal of Molecular Graphics* **1990**, *8*, 214–220.
- [16] Hübschle, C.B.; Dittrich, B. *MoleCoolQt*—A molecule viewer for charge-density research. *J. Appl. Crystallogr.* **2011**, *44*, 238–240.
- [17] Farrugia, L.J. *WinXD*, University of Glasgow, 2016.
